# Supplementary material for: An open-framework silicogermanate regularly constructed from natrolite zeolite chains and Ge9O18(OH)4 clusters
Source: Royal Society of Chemistry journal article supplement (doi:10.1039/c8dt04175j), 2018-01-01
Supplement: c8dt04175j1.pdf [file c8dt04175j1.pdf]

**An open-framework silicogermanate regularly constructed from natrolite zeolite  
chains and  $\text{Ge}_9\text{O}_{18}(\text{OH})_4$  clusters**

Donghui Jo, Wanuk Choi, Jiho Shin and Suk Bong Hong\*

*Center for Ordered Nanoporous Materials Synthesis, Division of Environmental Science  
and Engineering, POSTECH, Pohang 37673, Korea*

\*sbhong@postech.ac.kr

## Structural analysis

Synchrotron single-crystal XRD data for as-made PST-18 were collected at -173 °C on the 2D beamline of the Pohang Acceleration Laboratory (PAL; Pohang, Korea) using an MX225-HS CCD area detector with monochromated X-ray ( $\lambda = 0.62000 \text{ \AA}$ ) in a scan width of  $1.00^\circ$  around the omega axis by collecting 360 frames. The raw data were processed and scaled using the programs *HKL-3000* and *DENZO*.<sup>1</sup> Corrections for the Lorentz and polarization effects, along with an empirical absorption correction, were applied. The space group was determined by the program *XPREP*, and the structure was solved by direct methods using *SHELXS*.<sup>2</sup> The structure refinement was carried out with full-matrix least-squares refinements on  $F^2$  using the program *SHELXL2018*.<sup>2</sup> The data collection conditions and crystallographic parameters are summarized in Table S2. The space group of as-made PST-18 was determined as *Cccm* (No. 66) with unit cell parameters  $a = 12.895(3) \text{ \AA}$ ,  $b = 20.421(4) \text{ \AA}$ ,  $c = 20.281(4) \text{ \AA}$ , and  $V = 5340.6(19) \text{ \AA}^3$ .

Three crystallographically distinct tetrahedral sites (T-sites) and three Ge centers were found in the natrolite (NAT) chains and  $\text{Ge}_9$  clusters, respectively. The terminal atoms bonded to Ge3 atoms were assigned to the OH O atom, the existence of which is evidenced by  $^1\text{H}$  MAS NMR and IR analyses (Figs. 2 and 5). The locations of TMA cations were derived from Fourier difference maps, and their total content was restrained to make the as-made material electrically neutral. The Si/Ge occupancies of three different T-sites in the natrolite chain were constrained based on their average T-O bond distances: the average T1-O bond length was determined to be  $1.60 \text{ \AA}$ , which is essentially the same as the average Si-O bond distance ( $1.61 \text{ \AA}$ ) of typical zeolites,<sup>3,4</sup> but sites T2 and T3 have average T-O bond lengths of  $1.68$  and  $1.70 \text{ \AA}$ , respectively. This suggests that site T1 in the natrolite chain may be almost exclusively occupied by Si atoms, whereas the Si and Ge atoms are distributed statistically over sites T2 and T3. Therefore, the Si/Ge occupancy of site T1 was fixed to 100% Si, and those of both sites T2 and T3 were constrained to 54.1% Si and 45.9% Ge (calculated from elemental analysis) during the refinements. All the framework and extraframework atoms were anisotropically refined. The final atomic positions, anisotropic displacement parameters, and selected bond distances and angles are listed in Tables S3-S5. The dimensions of the pore opening are calculated using an oxygen radius of  $1.35 \text{ \AA}$ .

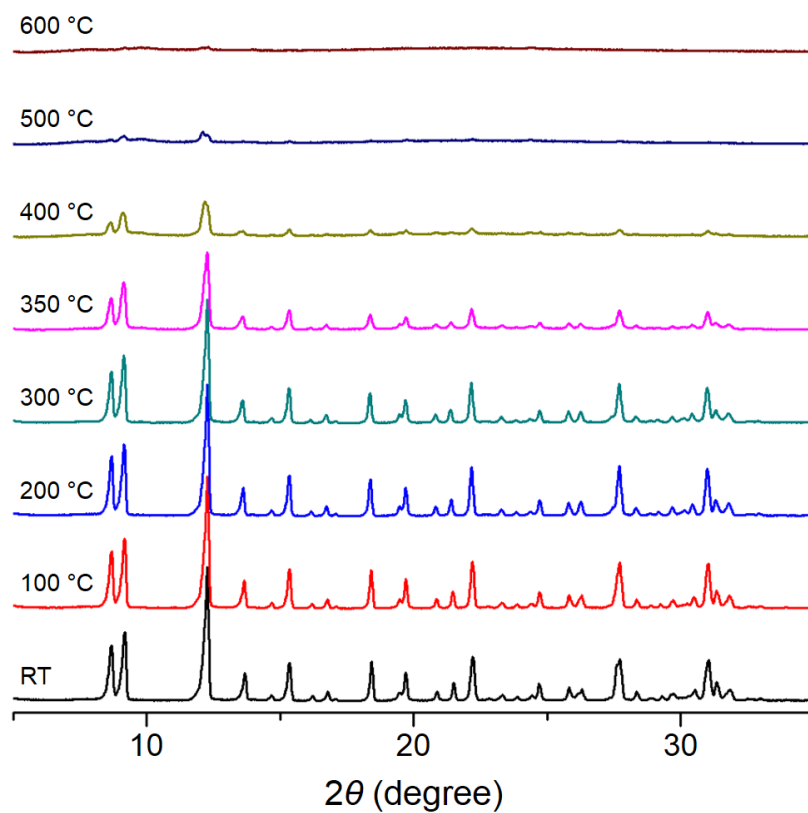

**Fig. S1** Powder XRD patterns of as-made PST-18 recorded during *in situ* heating under vacuum to a residual pressure of  $5 \times 10^{-3}$  Torr.

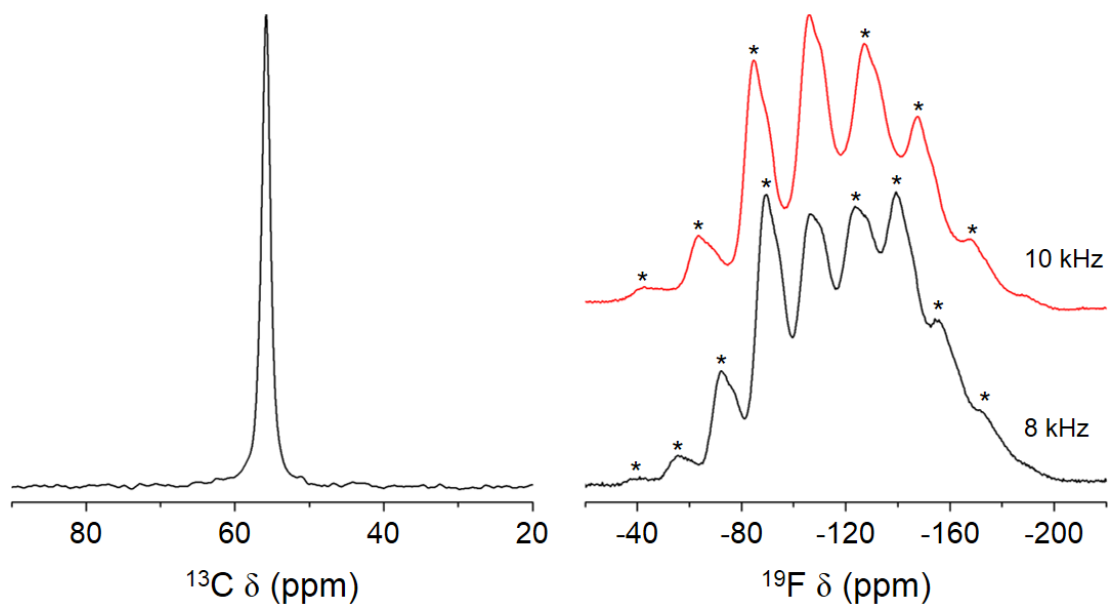

**Fig. S2**  $^1\text{H}$ - $^{13}\text{C}$  CP (left) and  $^{19}\text{F}$  (right) MAS NMR spectra of as-made PST-18. The  $^{19}\text{F}$  MAS NMR spectra were measured at two different spinning rates (8 and 10 kHz) to identify spinning side bands, which are marked by asterisks.

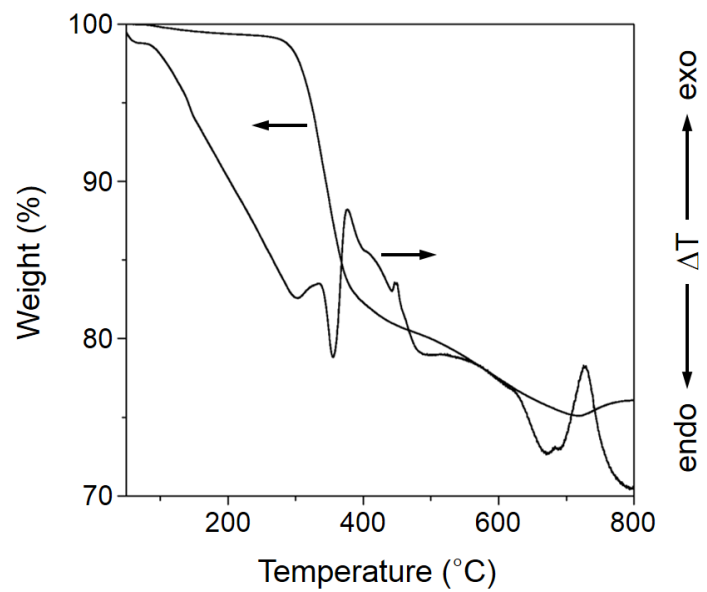

**Fig. S3** TGA/DTA profiles for as-made PST-18.

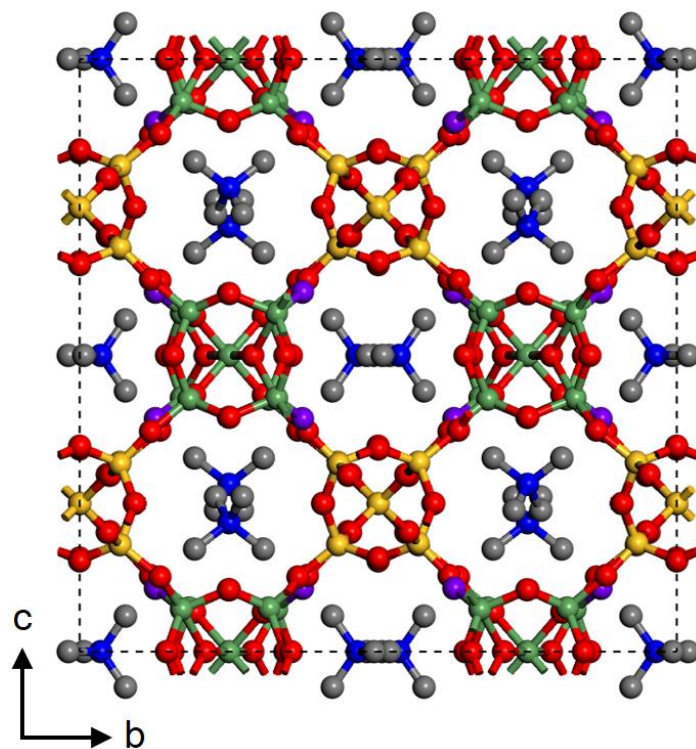

**Fig. S4** Refined structure of as-made PST-18 with refined TMA locations viewed along the  $a$  axis. T-atoms in the chain, where T is Si or Ge, yellow; Ge atoms in the cluster, green; O atoms, red; OH O atoms, purple; C atoms, grey; N atoms, blue.

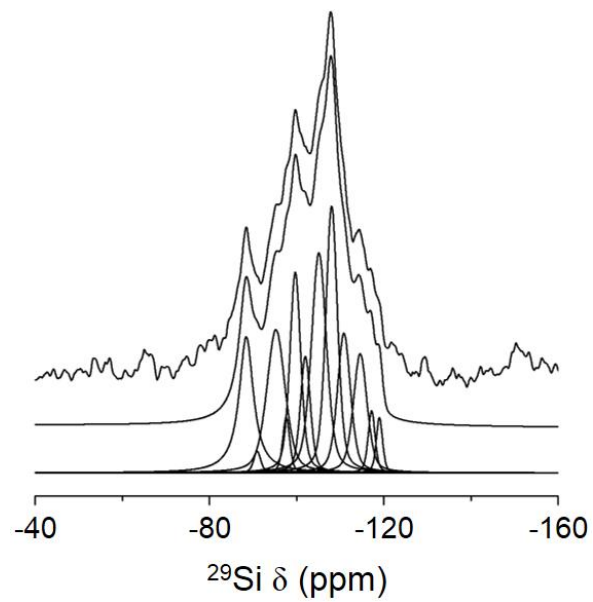

**Fig. S5**  $^{29}\text{Si}$  MAS NMR spectrum of as-made PST-18: (top to bottom) experimental, simulated, and deconvoluted components.

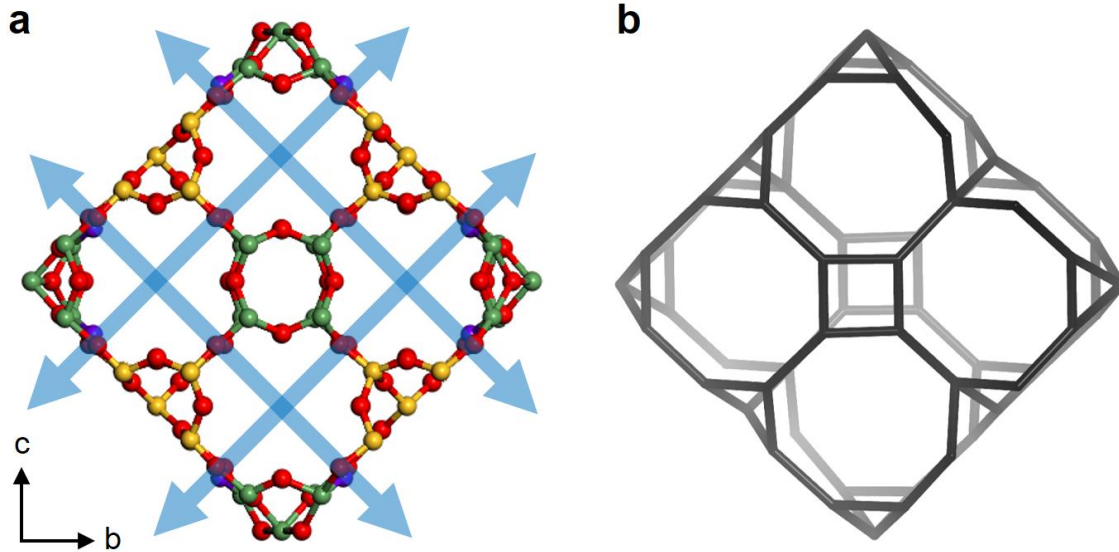

**Fig. S6** The cuboid-shaped cavity in PST-18 containing eight 7-ring and eight 8-ring windows. (a) T-atoms in the chain, where T is Si or Ge, yellow; Ge atoms in the cluster, green; O atoms, red; OH O atoms, purple. The blue arrows present the interrupted 7-ring channels by one OH group perpendicular to the  $a$  axis. (b) The black lines indicate the connections between Si and Ge atoms while all O atoms have been omitted.



**Table S1** Effects of the type of TMA and F sources on PST-18 synthesis

| Run <sup>a</sup> | F source          | TMA source | $x$ | Product <sup>c</sup>           |
|------------------|-------------------|------------|-----|--------------------------------|
| 1                | TMAF              | TMAF       | 0.0 | PST-18                         |
| 2                | HF                | -          | 0.0 | GeO <sub>2</sub> + dense phase |
| 3                | HF                | TMACl      | 1.0 | GeO <sub>2</sub> + dense phase |
| 4                | NH <sub>4</sub> F | -          | 0.0 | Pharmacosiderite + (amorphous) |
| 5                | NH <sub>4</sub> F | TMACl      | 1.0 | Pharmacosiderite + (amorphous) |
| 6 <sup>b</sup>   | NH <sub>4</sub> F | TMAOH      | 1.0 | AST + unknown                  |

<sup>a</sup> The composition of the final synthesis mixture was  $1.0AF \cdot xR \cdot 0.4GeO_2 \cdot 0.6SiO_2 \cdot 4.0H_2O$ , where A is TMA, H, or NH<sub>4</sub>,  $x$  is 0.0 or 1.0, and R is TMACl or TMAOH, unless otherwise stated. All syntheses were performed under static condition at 175 °C for 28 days. <sup>b</sup> Run performed at  $H_2O/(Si+Ge) = 5.0$ . <sup>c</sup> The product appearing first is the major phase, and the product obtained in a trace amount is given in parentheses.

**Table S2** Single-crystal XRD data collection conditions and crystallographic data for as-made PST-18

|                                                              |                                                                                                                               |
|--------------------------------------------------------------|-------------------------------------------------------------------------------------------------------------------------------|
| Refined unit cell composition                                | TMA <sub>16.0</sub>   Si <sub>29</sub> Ge <sub>11</sub> O <sub>80</sub>   Ge <sub>9</sub> O <sub>18</sub> (OH) <sub>4</sub> ] |
| Crystal system                                               | Orthorhombic                                                                                                                  |
| Space group                                                  | <i>Cccm</i> (No. 66)                                                                                                          |
| <i>a</i> (Å)                                                 | 12.895(3)                                                                                                                     |
| <i>b</i> (Å)                                                 | 20.421(4)                                                                                                                     |
| <i>c</i> (Å)                                                 | 20.281(4)                                                                                                                     |
| Unit cell volume (Å <sup>3</sup> )                           | 5340.6(19)                                                                                                                    |
| <i>Z</i>                                                     | 8                                                                                                                             |
| Crystal shape                                                | Prismatic                                                                                                                     |
| Crystal color                                                | Colorless                                                                                                                     |
| Crystal size (mm)                                            | 0.007 × 0.002 × 0.001                                                                                                         |
| X-ray source                                                 | 2D, PAL                                                                                                                       |
| Wavelength (Å)                                               | 0.62000                                                                                                                       |
| Detector                                                     | CCD area detector, MX225-HS                                                                                                   |
| Crystal-to-detector distance (mm)                            | 66                                                                                                                            |
| Temperature (°C)                                             | -173(2)                                                                                                                       |
| No. of total reflections collected                           | 4224                                                                                                                          |
| $\theta$ range for data collection (°)                       | 1.629-21.129                                                                                                                  |
| No. of unique reflections, <i>m</i>                          | 2272                                                                                                                          |
| No. of unique reflections [ $F_o > 4\sigma(F_o)$ ]           | 1058                                                                                                                          |
| No. of parameters, <i>s</i>                                  | 199                                                                                                                           |
| No. of restraints                                            | 315                                                                                                                           |
| Data/parameter ratio, <i>m/s</i>                             | 11.42                                                                                                                         |
| Completeness (%)                                             | 100                                                                                                                           |
| Final <i>R</i> <sub>1</sub> , <i>wR</i> <sub>2</sub> indices | 0.1031, 0.3558                                                                                                                |
| Goodness of fit                                              | 1.089                                                                                                                         |
| Largest diff. peak and hole (e·Å <sup>-3</sup> )             | 1.71, -3.31                                                                                                                   |

**Table S3** Atomic coordinates and occupancy factors for as-made PST-18

| Atom | <i>x</i>    | <i>y</i>    | <i>z</i>    | Wyckoff position | Occupancy                   |
|------|-------------|-------------|-------------|------------------|-----------------------------|
| T1   | 0.0563(6)   | 0.0668(3)   | 0.1829(3)   | 16 <i>m</i>      | 1/0 <sup>a</sup>            |
| T2   | 0.24840     | 0           | 1/4         | 8 <i>g</i>       | 0.541/0.459(1) <sup>a</sup> |
| T3   | 0.44150     | 0.06760     | 0.31960     | 16 <i>m</i>      | 0.541/0.459(1) <sup>a</sup> |
| Ge1  | 0.0692(2)   | 0.18328(13) | 0.07370(14) | 16 <i>m</i>      | 1                           |
| Ge2  | 1/4         | 1/4         | 0           | 4 <i>e</i>       | 1                           |
| Ge3  | 0.0293(2)   | 0.32951(13) | 0.07164(13) | 16 <i>m</i>      | 1                           |
| O1   | 0.1323(14)  | 0.3731(8)   | 0.1069(8)   | 16 <i>m</i>      | 1                           |
| O2   | -0.0674(14) | 0.3657(8)   | 0.1262(9)   | 16 <i>m</i>      | 1                           |
| O3   | -0.039(2)   | 0.3543(12)  | 0           | 8 <i>l</i>       | 1                           |
| O4   | 0.0045(14)  | 0.2508(8)   | 0.1044(8)   | 16 <i>m</i>      | 1                           |
| O5   | 0.1192(19)  | 0.2900(11)  | 0           | 8 <i>l</i>       | 1                           |
| O6   | 0.2016(13)  | 0.1924(7)   | 0.0668(8)   | 16 <i>m</i>      | 1                           |
| O7   | 0.317(3)    | 0.0463(17)  | 0.2987(16)  | 16 <i>m</i>      | 1                           |
| O8   | 1/2         | 0.093(2)    | 1/4         | 8 <i>h</i>       | 1                           |
| O9   | 1/2         | 0           | 0.342(2)    | 8 <i>j</i>       | 1                           |
| O10  | 0.172(2)    | 0.0505(14)  | 0.2024(15)  | 16 <i>m</i>      | 1                           |
| O11  | 0           | 0.0916(13)  | 1/4         | 8 <i>h</i>       | 1                           |
| O12  | 0           | 0           | 0.1531(14)  | 8 <i>i</i>       | 1                           |
| O13  | 0.0415(17)  | 0.1187(8)   | 0.1283(9)   | 16 <i>m</i>      | 1                           |
| O14  | 0.014(2)    | 0.1561(11)  | 0           | 8 <i>l</i>       | 1                           |
| C1   | -0.285(3)   | 0.3075(14)  | 0.1732(18)  | 16 <i>m</i>      | 1.000(1)                    |
| C2   | -0.158(2)   | 0.2723(18)  | 0.2613(17)  | 16 <i>m</i>      | 1.000(1)                    |
| C3   | -0.355(4)   | 0.518(3)    | 0           | 8 <i>l</i>       | 1.000(1)                    |
| C4   | -0.291(3)   | 0.4228(18)  | -0.0601(13) | 16 <i>m</i>      | 1.000(1)                    |
| C5   | -0.170(4)   | 0.493(2)    | 0           | 8 <i>l</i>       | 1.000(1)                    |
| N1   | -1/4        | 1/4         | 0.2176(15)  | 8 <i>k</i>       | 1.000(1)                    |
| N2   | -0.276(2)   | 0.4642(15)  | 0           | 8 <i>l</i>       | 1.000(1)                    |

<sup>a</sup> Si/Ge occupancy.

**Table S4** Anisotropic displacement parameters for as-made PST-18

| Atom | $U_{11}$   | $U_{22}$   | $U_{33}$   | $U_{12}$    | $U_{13}$    | $U_{23}$    |
|------|------------|------------|------------|-------------|-------------|-------------|
| T1   | 0.037(5)   | 0.009(3)   | 0.011(3)   | -0.010(3)   | 0.011(3)    | -0.004(2)   |
| T2   | 0.046(6)   | 0.104(8)   | 0.085(7)   | 0           | 0           | 0.003(5)    |
| T3   | 0.057(5)   | 0.074(4)   | 0.062(4)   | 0.003(3)    | 0.001(3)    | 0.002(4)    |
| Ge1  | 0.0169(17) | 0.0239(14) | 0.0226(15) | -0.0054(12) | 0.0029(13)  | 0.0035(13)  |
| Ge2  | 0.001(3)   | 0.013(3)   | 0.012(2)   | -0.0024(19) | 0           | 0           |
| Ge3  | 0.0112(16) | 0.0237(14) | 0.0187(14) | -0.0026(12) | -0.0003(12) | -0.0008(13) |
| O1   | 0.020(7)   | 0.017(8)   | 0.030(9)   | -0.003(6)   | 0.002(6)    | -0.010(7)   |
| O2   | 0.022(8)   | 0.034(7)   | 0.022(7)   | 0.004(8)    | 0.011(7)    | 0.002(8)    |
| O3   | 0.019(10)  | 0.035(12)  | 0.019(6)   | 0.017(9)    | 0           | 0           |
| O4   | 0.007(6)   | 0.024(4)   | 0.021(6)   | -0.007(4)   | 0.000(5)    | 0.000(4)    |
| O5   | 0.011(9)   | 0.016(10)  | 0.017(7)   | 0.004(7)    | 0           | 0           |
| O6   | 0.012(5)   | 0.021(8)   | 0.014(7)   | 0.001(5)    | -0.001(5)   | 0.005(5)    |
| O7   | 0.067(8)   | 0.130(16)  | 0.089(13)  | -0.01(1)    | -0.012(9)   | -0.008(12)  |
| O8   | 0.099(17)  | 0.098(18)  | 0.068(14)  | 0           | 0.021(14)   | 0           |
| O9   | 0.092(16)  | 0.072(13)  | 0.092(18)  | 0.015(13)   | 0           | 0           |
| O10  | 0.041(8)   | 0.089(14)  | 0.092(14)  | 0.004(9)    | -0.004(8)   | -0.006(11)  |
| O11  | 0.093(18)  | 0.028(13)  | 0.029(10)  | 0           | 0.038(13)   | 0           |
| O12  | 0.092(17)  | 0.024(9)   | 0.035(13)  | -0.035(12)  | 0           | 0           |
| O13  | 0.063(10)  | 0.024(6)   | 0.026(7)   | -0.020(7)   | 0.014(8)    | 0.006(6)    |
| O14  | 0.015(11)  | 0.014(10)  | 0.028(6)   | -0.005(10)  | 0           | 0           |
| C1   | 0.05(3)    | 0.10(3)    | 0.16(4)    | 0.01(3)     | 0.00(3)     | 0.04(3)     |
| C2   | 0.18(5)    | 0.16(4)    | 0.09(3)    | -0.11(3)    | -0.08(3)    | 0.03(3)     |
| C3   | 0.14(4)    | 0.15(5)    | 0.07(4)    | 0.11(4)     | 0           | 0           |
| C4   | 0.11(4)    | 0.12(4)    | 0.10(3)    | 0.01(3)     | 0.01(3)     | -0.05(2)    |
| C5   | 0.10(3)    | 0.05(3)    | 0.09(4)    | 0.02(2)     | 0           | 0           |
| N1   | 0.04(3)    | 0.07(2)    | 0.05(2)    | -0.028(19)  | 0           | 0           |
| N2   | 0.08(3)    | 0.07(3)    | 0.06(2)    | 0.04(2)     | 0           | 0           |

**Table S5** Selected bond lengths and angles for as-made PST-18

| Bond length (Å) |           | Bond angle (°) |           |
|-----------------|-----------|----------------|-----------|
| T1-O10          | 1.57(3)   | T1-O10-T2      | 144.0(19) |
| T1-O11          | 1.623(11) | T1-O11-T1      | 143.6(19) |
| T1-O12          | 1.659(12) | T1-O12-T1      | 137.3(19) |
| T1-O13          | 1.545(19) | T1-O13-Ge1     | 160.2(15) |
| T1-O (Avg.)     | 1.60      | T2-O7-T3       | 144(2)    |
| T2-O7 (×2)      | 1.63(3)   | T3-O2-Ge3      | 130.5(11) |
| T2-O10 (×2)     | 1.73(3)   | T3-O8-T3       | 144(3)    |
| T2-O (Avg.)     | 1.68      | T3-O9-T3       | 148(3)    |
| T3-O2           | 1.756(18) | Ge1-O4-Ge3     | 120.2(10) |
| T3-O7           | 1.71(3)   | Ge1-O6-Ge2     | 116.8(8)  |
| T3-O8           | 1.684(13) | Ge1-O14-Ge1    | 117.9(13) |
| T3-O9           | 1.637(12) | Ge2-O5-Ge3     | 133.5(5)  |
| T3-O (Avg.)     | 1.70      | Ge3-O3-Ge3     | 110.2(13) |
| Ge1-O4          | 1.728(17) |                |           |
| Ge1-O6          | 1.724(17) |                |           |
| Ge1-O13         | 1.758(17) |                |           |
| Ge1-O14         | 1.745(12) |                |           |
| Ge1-O (Avg.)    | 1.74      |                |           |
| Ge2-O5 (×2)     | 1.87(2)   |                |           |
| Ge2-O6 (×4)     | 1.900(15) |                |           |
| Ge2-O (Avg.)    | 1.89      |                |           |
| Ge3-O1          | 1.751(17) |                |           |
| Ge3-O2          | 1.823(17) |                |           |
| Ge3-O3          | 1.772(14) |                |           |
| Ge3-O4          | 1.768(16) |                |           |
| Ge3-O5          | 2.026(16) |                |           |
| Ge3-O (Avg.)    | 1.83      |                |           |

## References

- 1 W. Minor, M. Cymborowski, Z. Otwinowski and M. Chruszcz, *Acta Cryst.*, 2006, **D62**, 859-866.
- 2 G. M. Sheldrick, *Acta Cryst.*, 2008, **A64**, 112-122.
- 3 R. D. Shannon, *Acta Cryst.*, 1976, **A32**, 751-767.
- 4 Ch. Baerlocher and L. B. McCusker, Database of Zeolite Structures, <http://www.iza-structure.org/databases/>, (accessed October 2018).
